# Supplementary material for: Circulating microRNAs Correlate with Multiple Myeloma and Skeletal Osteolytic Lesions
Source: MDPI journal article supplement (doi:10.3390/cancers13215258), 2021-10-20
Supplement: s1 [file s1]

Supplementary Material

# Circulating microRNAs Correlate with Multiple Myeloma and Skeletal Osteolytic Lesions

Sara Reis Moura, Hugo Abreu, Carla Cunha, Cláudia Ribeiro-Machado, Carla Oliveira, Mario Adolfo Barbosa, Herlander Marques and Maria Inês Almeida

**Table S1.** Receiver Operating Characteristic (ROC) curve analysis for circulating miR-16-5p, miR-20a-5p and miR-21-5p, or their combination (miRNA panel), when analyzing MM patients versus healthy controls.

|                    | Healthy vs. MM |       |                 |         |        |                             |                    |                    |
|--------------------|----------------|-------|-----------------|---------|--------|-----------------------------|--------------------|--------------------|
|                    | AUC            | SD    | <i>p</i> -value | CI 95 % |        | Cut-off<br>(Youden's index) | Sensitivity<br>(%) | Specificity<br>(%) |
|                    |                |       |                 | Lower   | Upper  |                             |                    |                    |
| <b>miR-16-5p</b>   | 0.665          | 0.061 | 0.011           | 0.5458  | 0.7843 | 4.417                       | 78.72              | 51.43              |
| <b>miR-20a-5p</b>  | 0.707          | 0.057 | 0.001           | 0.5961  | 0.8179 | 0.01145                     | 36.17              | 97.14              |
| <b>miR-21-5p</b>   | 0.654          | 0.060 | 0.018           | 0.5365  | 0.7717 | 0.002328                    | 57.45              | 71.43              |
| <b>miRNA panel</b> | 0.825          | 0.047 | <0.0001         | 0.7333  | 0.9166 | 0.5434                      | 78.72              | 80.00              |

MM—Multiple Myeloma; AUC—Area Under the Curve; SD—Standard deviation; CI—Confidence Interval

**Table S2.** Statistical differences in miRNA levels between multiple myeloma patients with and without bone lesions. Statistically significant differences are highlighted in bold (Mann–Whitney test, \*  $p < 0.05$ ).

| miRNA             | <i>p</i> -value |
|-------------------|-----------------|
| miR-16-5p         | 0.3412          |
| miR-20a-5p        | 0.6433          |
| miR-21-5p         | 0.7188          |
| miR-29a-3p        | 0.7970          |
| miR-29b-3p        | 0.3901          |
| <b>miR-29c-3p</b> | <b>0.0448 *</b> |
| miR-93-5p         | 0.5202          |
| miR-99a-5p        | 0.3283          |
| miR-146a-5p       | 0.1426          |
| miR-195-5p        | 0.6069          |
